# Supplementary material for: Comparative metabolic profiling of Haberlea rhodopensis, Thellungiella halophyla, and Arabidopsis thaliana exposed to low temperature
Source: Front Plant Sci. 2013 Dec 11;4:499. doi: 10.3389/fpls.2013.00499 (PMC3859123; doi:10.3389/fpls.2013.00499)
Supplement: Supplementary file 3 [file DataSheet3.XLSX]

## Sheet: Checklist
	Supplemental Table 2. Metabolite Reporting Guidelines (Checklist table)
	Level	Aspect	Information	Fill in
	general aspect	Type of metabolome analysis	targeted metabolite analysis	TRUE
			non-targeted metabolite class scale profiling	FALSE
			non-targeted metabolome scale profiling	FALSE
			non-targeted finger printing of mass features	FALSE
		Type of quantification	absolute or quantification	Relative quantification
		Type of reference samples	chemically defined	standard reference compounds aquired in chemical companies
			biologically defined	-
		Type of replication	analytical (same analytical sample preparation)	1
			technological (same biological preparation)	1
			biological (same experimental condition)	6
			full experiment	1
		Type of technology	reference publication	Lisec et al (2006)
		Sample preparation		chemical derivatized
			method of chromatography/separation	Lisec et al (2006)
			method of ionization	- 70 MeVolt hard ionization
			method of detection	electron impact ionization
	metabolite/mass feature	Metabolite	metabolite name	see table 2
			metabolite sum formula	see table 2
			metabolite structure and public source of metabolite identifier	Metabolites were identified in comparison to database entries of authentic standards (Kopka et al., 2005; Schauer et al., 2005).
		Identification	identification process	manually supervized with TagFinder software
			by authentic mass isotopomer added to one or all biological sample(s)	FALSE
			by authentic reference compound within a co-processed reference mixture	FALSE
			by authentic reference compound previously mapped to the analytical system	TRUE
			reference library	Metabolites were identified in comparison to database entries of authentic standards (Kopka et al., 2005; Schauer et al., 2005)
			type of mass spectrum
			by match of molecular mass (single mass fragment)	A minimum of 3 unique mass fragments was required for the relative quantification of metabolite pool sizes
			by match of fragments	YES
			by match of fragmentation pattern	YES
			by match of mass spectrum to reference library	Mass spectral matching thresholds were: Match > 650 (best match = 1000) and RI-deviation < 1.0%
			type of retention index
			by match of retention time (index) to reference library	fatty acid methylesters (FAMEs)
		Quantification	type of quantification	relative quantification by internal standard and sample fresh weight
		Validity testing	Recovery testing (chemical analog)	not performed
			Recovery testing (internally added mass isotopomer)	not performed
			Recovery testing (mixture of most divergent samples from the experiment)	not performed
			Test for linear range	not performed
			Limit of quantification (LOQ)	not performed
			Limit of detection (LOD)	not performed
			Mass spectral matching thresholds were: Match > 650 (best match = 1000) and RI-deviation < 1.0%

## Sheet: Overview
Supplemental Table 3. Overview of the metabolite reporting list.
GC-TOF-MS metabolites
	A	B	C	D	E	F	G	H	I
1
2	Experiment title:		Metabolic effect of chilling treatment on Haberlea rhodopensis, Arabidopsis thaliana and Thellungiella halophyla
3	Organism/Plant species:		Haberlea rhodopensis, Arabidopsis thaliana and Thellungiella halophyla
4	Organ/tissue:		Leaves
5	Analytical tool:		GC-TOF-MS
6
7	Peak/compound no.- number referenced back to the main text
8	Ret . Time- Time expected, Tag Time Index and Time deviation
9	Putative Name- putative identification of the metabolite/derivative
10	Corresponding metabolite name in literature
11	Mol. Formula- molecular formula of the metabolite or its FA adduct;
12	Mass to charge ratio (m/z)
13	(S)- identification confirmed by a standard compound
14	I, II, III- different isomers
15	Identification level (A; B; C; D)- (A) standard or NMR; (B) MS/MS; (C) MSE; (D) MS only
16
17	Peak/Compound no.	Time Expected	Tag Time Index	Time Deviation	Putative metabolite name (Derivative)	Corresponding Metabolite in Literature	Metabolite Class	Mol formula	Mass to charge ratio (m/z)	Species detected before	References	Identification level (A-D)
18	1	206847	206818	0.03	M000517_A106002-101_CONT-MST_206867_TOF_Glycolic acid (2TMS)	Glycolate	Hydroxy acid	C2H4O3	205	Tomato, Arabidopsis, potato, Lotus japonicus		A
19	2	208565	208940	0.16	M000026_A110001-101_METB_208565_TOF_Alanine, DL- (2TMS)	Alanine	Amino acids	C3H7NO2	116	Tomato, Arabidopsis, potato, Lotus japonicus		A
20	3	222650	222623	-0.01	M000071_A104002-101_METB_222650_TOF_Pyruvic acid (1MEOX) (1TMS)	Pyruvate	Organic acid	C3H4O3	89	Tomato, Arabidopsis, potato, Lotus japonicus		A
21	4	271580	271830	-0.01	M000030_A122001-101_METB_271580_TOF_Valine, DL- (2TMS)	Valine	Amino acids	C5H11NO2	144	Tomato, Arabidopsis, potato, Lotus japonicus		A
22	5	300730	300804	0.04	M000427_A122003-101_MST_300730_TOF_Malonic acid (2TMS)	Malonate	Dicarboxylic acid	C3H4O4	233	Tomato, Arabidopsis, potato		A
23	6	319193	319180	0.05	M000017_A132002-101_METB_319193_TOF_Isoleucine, L- (2TMS)	Isoleucine	Amino acids	C6H13NO2	158	Tomato, Arabidopsis, potato		A
24	7	325180	325104	0.05	M000031_A133001-101_METB_325180_TOF_Glycine (3TMS)	Glycine	Amino acids	C2H5NO2	174	Tomato, Arabidopsis, potato, Lotus japonicus		A
25	8	333520	332715	-0.22	M000075_A129001-101_METB_333520_TOF_Phosphoric acid (3TMS)	Phosphate	Inorganic acid	H3O4P	299	Tomato, Arabidopsis, potato, Lotus japonicus		A
26	9	338693	338550	-0.02	M000029_A132003-101_METB_338693_TOF_Proline, L- (2TMS)	Proline	Amino acids	C5H9NO2	142	Tomato, Arabidopsis, potato		A
27	10	340357	339779	-0.1	M000364_A127002-101_METB_340357_TOF_Urea (2TMS)	Urea	Amide	CH4N2O	189	Tomato, Arabidopsis, potato		A
28	11	345050	344797	-0.08	M000073_A135003-101_METB_345050_TOF_Glyceric acid, DL- (3TMS)	Glycerate	Hydroxy acid	C3H6O4	133	Tomato, Arabidopsis, potato		A
29	12	348220	347792	-0.1	M000347_A128003-101_CONT-METB_348220_TOF_Benzoic acid (1TMS)	Benzoate	Aromatic acids	C7H6O2	143	Tomato, Arabidopsis, potato, Lotus japonicus		A
30	13	357523	357603	0.05	M000015_A138001-101_METB_357523_TOF_Serine, DL- (3TMS)	Serine	Amino acids	C3H7NO3	218	Tomato, Arabidopsis, potato		A
31	14	365427	365190	-0.13	M000074_A134001-101_METB_365427_TOF_Succinic acid (2TMS)	Succinate	Organic acids	C4H6O4	129	Tomato, Arabidopsis, potato, Lotus japonicus		A
32	15	368365	367678	-0.18	M000016_A140001-101_METB_368365_TOF_Threonine, DL- (3TMS)	Threonine	Amino acids	C4H9NO3	117	Tomato, Arabidopsis, potato		A
33	16	371255	371205	0.03	M000067_A137001-101_METB_371255_TOF_Fumaric acid (2TMS)	Fumarate	Organic acids	C4H4O4	245	Tomato, Arabidopsis, potato, Lotus japonicus		A
34	17	386210	385661	-0.15	M000457_A133004-101_METB_386210_TOF_Nicotinic acid (1TMS)	Nicotinate	N-heterocycle acid	C6H5NO2	136	Tomato, potato		A
35	18	394250	394160	-0.03	M000027_A144001-101_METB_394250_TOF_Alanine, beta- (3TMS)	β-Alanine	Amino acids	C3H7NO2	174	Tomato, Arabidopsis, potato, Lotus japonicus		A
36	19	440995	441375	0.12	M000065_A149001-101_METB_440995_TOF_Malic acid, DL- (3TMS)	Malate	Organic acids	C4H6O5	233	Tomato, Arabidopsis, potato, Lotus japonicus		A
37	20	442640	442796	0.04	M000454_A154001-101_MST_442640_TOF_Erythronic acid (4TMS)	Erythronate	Acid (Hydroxy, lactone)	C4H6O4	292	Tomato, potato		A
38	21	448453	448590	0	M000034_A153001-101_METB_448453_TOF_Proline, 4-hydroxy-, DL-, trans- (3TMS)	4-hydroxyproline	Amino acid	C5H9NO3	256	Tomato, Arabidopsis, potato		A
39	22	452200	452296	0.06	M000114_A153003-101_METB_452200_TOF_Butyric acid, 4-amino- (3TMS)	GABA	Amino acids	C4H9NO2	174	Tomato, Arabidopsis, potato, Lotus japonicus		A
40	23	457283	457510	0.13	M000033_A152002-101_METB_457283_TOF_Aspartic acid, L- (3TMS)	Aspartate	Amino acids	C4H7NO4	232	Tomato, Arabidopsis, potato		A
41	24	458330	458522	-0.1	M000078_A156001-101_METB_458330_TOF_Threonic acid (4TMS)	Threonate	Hydroxy acid	C4H8O5	292	Tomato, Arabidopsis, potato		A
42	25	479210	479576	0.08	M000013_A187001-101_METB_479210_TOF_Asparagine, DL- (4TMS)	Asparagine	Amino acid	C4H8N2O3	188	Tomato, Arabidopsis, potato		A
43	26	492650	492869	0.08	M000032_A174008-101_MST_492650_TOF_Glutamine, DL- (4TMS)	Glutamine	Amino acids	C5H10N2O3	227	Tomato, Arabidopsis, potato, Lotus japonicus		A
44	27	498150	498798	0.08	M000579_A166001-101_METB_498150_TOF_Xylose, D- (1MEOX) (4TMS)	Xylose	Sugar (pentose)	C5H10O5	103	Tomato, Arabidopsis, potato		A
45	28	506483	506305	-0.01	M000037_A153002-101_METB-METB_506483_TOF_Pyroglutamic acid, DL- (2TMS)	Pyroglutamate	Lactam	C5H7NO3	156	Tomato, Arabidopsis, potato		A
46	29	507780	508233	0.09	M000036_A163001-101_METB_507780_TOF_Glutamic acid, DL- (3TMS)	Glutamate	Amino acids	C5H9NO5	246	Tomato, Arabidopsis, potato, Lotus japonicus		A
47	30	515530	515682	0.03	M000590_A172002-101_METB_515530_TOF_Rhamnose, DL- (1MEOX) (4TMS)	Rhamnose	Sugar (Hexose)	C6H12O5	117	Tomato, Arabidopsis, potato, Lotus japonicus		A
48	31	517180	517454	0.09	M000186_A175002-101_METB-METB_517180_TOF_Putrescine (4TMS)	Putrescine	Polyamine	C4H12N2	174	Tomato, Arabidopsis, potato, Lotus japonicus		A
49	32	523847	523784	0	M000571_A158004-101_METB_523847_TOF_Glutaric acid, 2-oxo- (1MEOX) (2TMS)	2-oxoglutarate	Organic acid	C5H6O5	198	Tomato, Arabidopsis, potato, Lotus japonicus		A
50	33	531145	530963	-0.06	M000011_A164001-101_METB_531145_TOF_Phenylalanine, DL- (2TMS)	Phenylalanine	Amino acids	C9H11NO2	218	Tomato, Arabidopsis, potato, Lotus japonicus		A
51	34	550100	550233	0.04	M000013_A168001-101_METB_550100_TOF_Asparagine, DL- (3TMS)	Asparagine	Amino acids	C4H8N2O3	116	Tomato, Arabidopsis, potato		A
52	35	553540	553392	0.14	M000592_A172006-101_METB_553540_TOF_Adipic acid, 2-amino-, DL- (3TMS)	2-aminoadipate	Amino acid	C6H11NO4	128	Tomato, Arabidopsis, potato		A
53	36	570427	570717	0.07	M000028_A182002-101_METB-METB_570427_TOF_Ornithine, DL- (4TMS)	Ornithine	Amino acids	C5H12N2O2	142	Tomato, Arabidopsis, potato, Lotus japonicus		A
54	37	574230	574259	0.02	M000328_A177002-101_METB_574230_TOF_Glycerol-3-phosphate, DL- (4TMS)	G3P	Triol phosphate	C3H9O6P	299	Tomato, Arabidopsis, potato		A
55	38	579680	577102	-0.04	M000606_A188004-101-xxx_NA_642058.88_TRUE_VAR5_FAME_Fructose (1MEOX) (5TMS) BP	Fructose	Sugar (Hexose)	C6H12O6	217	Tomato, Arabidopsis, potato, Lotus japonicus		A
56	39	588295	588832	0.03	M000055_A193001-101_METB_588295_TOF_Sorbitol, D- (6TMS)	Sorbitol	Polyol (Hexitol)	C6H14O6	307	Tomato, potato, Lotus japonicus		A
57	40	590400	590651	0.14	M000040_A189002-101_METB_590400_TOF_Glucose, D- (1MEOX) (5TMS)	Glucose	Sugar (Hexose, aldose)	C6H12O6	160	Tomato, Arabidopsis, potato		A
58	41	592883	592895	0.04	M000069_A182004-101_METB-METB_592883_TOF_Citric acid (4TMS)	Citrate	Organic acid	C6H8O7	273	Tomato, Arabidopsis, potato, Lotus japonicus		A
59	42	598300	598363	0.11	M000032_A178001-101_METB_598300_TOF_Glutamine, DL- (3TMS)	Glutamine	Amino acids	C5H10N2O3	156	Tomato, Arabidopsis, potato		A
60	43	605940	606096	0.02	M000038_A183001-101_METB-METB_605940_TOF_Arginine, DL-, -NH3 (3TMS)	Arginine	Amino acids	C6H11N3O2	157	Tomato, Arabidopsis, potato		A
61	44	615467	615380	0	M000014_A192003-101_METB_615467_TOF_Lysine, L- (4TMS)	Lysine	Amino acids	C6H14N2O2	156	Tomato, Arabidopsis, potato		A
62	45	624990	624905	0.17	M000082_A185002-101_METB-METB_624990_TOF_Dehydroascorbic acid dimer (TMS)	Dehydroascorbate	Hydroxy acid	C6H6O6	173	Tomato, Arabidopsis, potato		A
63	46	651990	651184	-0.12	M000001_A195002-101_METB_651990_TOF_Ascorbic acid, L(+)- (4TMS)	Ascorbate	Organic acids	C6H8O6	117	Tomato, Arabidopsis, potato		A
64	47	653910	654234	0.06	M000060_A209002-101_METB_653910_TOF_Inositol, myo- (6TMS)	Inositol	Polyol	C6H14O6	305	Tomato, Arabidopsis, potato		A
65	48	658337	658228	-0.01	M000035_A194002-101_METB_658337_TOF_Tyrosine, DL- (3TMS)	Tyrosine	Amino acids	C9H11NO3	218	Tomato, Arabidopsis, potato, Lotus japonicus		A
66	49	679450	678545	-0.13	M000039_A192006-101_METB_679450_TOF_Histidine, L- (3TMS)	Histidine	Amino acids	C6H9N3O2	254	Tomato, Arabidopsis, potato		A
67	50	790560	790125	-0.02	M000012_A223001-101_METB_790560_TOF_Tryptophan, L- (3TMS)	Tryptophan	Amino acids	C11H12N2O2	202	Tomato, Arabidopsis, potato		A
68	51	840783	841182	0.03	M000044_A264001-101_METB_840783_TOF_Sucrose, D- (8TMS)	Sucrose	Sugar (disaccharide)	C12H22O11	437	Tomato, Arabidopsis, potato, Lotus japonicus		A
69	52	870355	870355	-0.03	M000048_A274001-101_METB_870355_TOF_Maltose, D- (1MEOX) (8TMS)	Maltose	Sugar (disaccharide)	C12H22O11	204	Tomato, Arabidopsis, potato, Lotus japonicus		A
70	53	876240	875962	-0.03	M000671_A274002-101_METB_876240_TOF_Trehalose, alpha,alpha'-, D- (8TMS)	Trehalose	Sugar (disaccharide)	C12H22O11	191	Tomato, Arabidopsis, potato		A
71	54	914380	913464	-0.03	M000171_A287003-101_METB_914380_TOF_Melibiose (1MEOX) (8TMS)	Melibiose	Sugar (Disaccharide)	C12H22O11	160	Tomato, potato		A
72	55	940280	939713	-0.08	M000673_A299002-101_METB_940280_EIROE_Galactinol (9TMS)	Galactinol	Conjugate (Hexosyl, Inositol)	C12H22O11	204	Tomato, Arabidopsis, potato, Lotus japonicus		A
73	56	1033367	1033165	-0.04	M000049_A337002-101_METB_1033367_TOF_Raffinose (11TMS)	Raffinose	Sugar (trisaccharide)	C18H32O16	361	Tomato, Arabidopsis, potato, Lotus japonicus		A
