# Supplementary material for: Comparative metabolic profiling of Haberlea rhodopensis, Thellungiella halophyla, and Arabidopsis thaliana exposed to low temperature
Source: Front Plant Sci. 2013 Dec 11;4:499. doi: 10.3389/fpls.2013.00499 (PMC3859123; doi:10.3389/fpls.2013.00499)
Supplement: Supplementary file 4 [file DataSheet4.XLSX]

## Sheet: Table
Supplemental Table 4		Profiling results of all identified metabolites. Values are the means ± SEM of six biological replicates.
	Arabidopsis thaliana						Thellungiella halophyla						Haberlea rhodopensis
Metabolites	Control		Chilling		Recvery		Control		Chilling		Recvery		Control		Chilling		Recvery
	Means	SEM	Means	SEM	Means	SEM	Means	SEM	Means	SEM	Means	SEM	Means	SEM	Means	SEM	Means	SEM
Glycolate	0.00186219	0.000455081	0.00162251	0.000111083	0.00221531	8.52332e-05	0.00205758	5.69898e-05	0.002111	0.000123056	0.0021417	0.000113134	0.00256832	0.000222623	0.00211543	7.25161e-05	0.00234282	0.000103828
Alanine	0.422419	0.0643025	0.868129	0.0348471	0.424673	0.0174068	0.64596	0.067578	2.20042	0.172246	0.584342	0.0779308	0.256558	0.0840765	0.28265	0.0243184	0.273481	0.0294858
Pyruvate	0.0060944	0.0018258	0.0110845	0.000825559	0.00688105	0.000448264	0.00573992	0.00060151	0.0112383	0.00102683	0.00335217	0.000198438	0.00872444	0.00333505	0.00699859	0.0016437	0.00381566	0.000607098
Valine	0.518753	0.113113	0.429815	0.06692	0.374082	0.0312953	1.83864	0.295881	2.37554	0.363191	1.84156	0.341889	0.0542572	0.00995586	0.0325455	0.00677294	0.0424606	0.00528001
Malonate	NA		NA		NA		0.00279578	0.00036124	0.00345709	0.000696168	0.00273674	0.000170165	0.00181694	0.000171501	NA		NA
Isoleucine	0.321433	0.0877912	0.2382	0.0657877	0.206984	0.0263382	0.971423	0.179524	1.19412	0.250251	1.09627	0.215617	0.0222669	0.00471395	0.0305946	0.00439028	0.0216794	0.00262921
Glycine	0.0280217	0.00530069	0.018521	0.00270635	0.0374626	0.00203688	0.0521197	0.00311046	0.0728005	0.0101427	0.0601929	0.00780553	0.018298	0.00191735	0.0168953	0.00231266	0.0195313	0.00344321
Phosphate	0.0588283	0.0274355	0.0425356	0.00672404	0.0578304	0.00836508	1.83011	0.264809	1.48463	0.152066	1.87796	0.0829439	0.826713	0.391683	0.879622	0.106422	1.17527	0.173078
Proline	0.0688401	0.0106416	0.432419	0.0239834	0.0687213	0.00129592	0.570368	0.0671603	0.405254	0.0828087	2.15711	0.237971	0.0609205	0.0127258	0.0631669	0.00627295	0.0262195	0.00414121
Urea	0.0847633	0.0119781	0.0695625	0.00781558	0.083846	0.00480192	0.219173	0.025805	0.217512	0.0152102	0.333613	0.0298811	0.015843	0.00226927	0.0280632	0.00805972	0.0215302	0.00252174
Glycerate	0.00343503	0.000257228	0.0027152	0.000171871	0.00439435	0.000157915	0.00587594	0.00111701	0.00594775	0.000385897	0.00775263	0.000279978	0.0258563	0.00482527	0.0123961	0.000844118	0.0221541	0.00264196
Benzoate	0.00673718	0.00038427	0.00752932	0.000512965	0.00825515	0.000292492	0.00387415	0.000547175	0.00400456	0.000285404	0.00321407	0.000234224	0.00453167	0.00135154	0.00673418	0.00170321	0.00387486	0.000314602
Serine	0.245448	0.0500218	0.20638	0.0059175	0.221946	0.00947831	1.29901	0.115348	1.08757	0.0326879	1.94387	0.0819858	0.179843	0.035644	0.0397624	0.00848398	0.103619	0.0129188
Succinate	0.0462076	0.00964337	0.0302414	0.00420661	0.0332972	0.00173398	0.028438	0.00472301	0.0576774	0.00695459	0.0292312	0.00144322	0.057439	0.00495241	0.0465609	0.00557322	0.0659355	0.00517491
Threonine	0.278113	0.0280861	0.292152	0.0163401	0.243456	0.00791356	1.10927	0.0731677	1.26873	0.102385	1.03043	0.117331	0.076317	0.00955626	0.0603936	0.00417028	0.0454625	0.00168152
Fumarate	1.43884	0.231734	1.26681	0.0760376	1.53769	0.0453252	0.0426096	0.00782079	0.0806145	0.0061899	0.0191903	0.00180024	0.00757687	0.0020485	0.0136119	0.000582382	0.016277	0.000953269
Nicotinate	0.00478966	0.00171011	0.00752936	0.000638659	0.0087888	0.000670011	0.00135631	0.000419883	0.00221797	0.000314236	0.00234612	0.000331262	0.00599997	0.00293441	0.00538245	0.00137168	0.0120538	0.00498189
beta-alanine	0.00430651	0.00066547	0.00290062	0.000304182	0.00405762	0.000352027	0.0115943	0.00120513	0.0157535	0.00183309	0.00471826	0.00076522	0.00183089	0.000259514	0.00184765	0.000159628	0.00137412	7.88057e-06
Malate	0.0827609	0.0148472	0.0727476	0.00376367	0.0751951	0.00225292	0.79366	0.102664	1.18508	0.0491512	0.810729	0.0899087	1.05429	0.101228	1.00091	0.106282	1.03034	0.0896086
Erythronate	NA		NA		NA		0.00616575	0.00304888	0.00588028	0.00073337	0.00729653	0.00051042	0.0573165	0.0114086	0.0629764	0.00924772	0.0609822	0.0273887
4-hydroxyproline	0.00248106	0.000152663	0.00270269	9.92213e-05	0.00324968	9.12655e-05	0.00444286	0.000487378	0.00430243	0.000438112	0.0217122	0.00209099	NA		NA		0.00137768	1.68323e-05
GABA	0.103702	0.0203583	0.0858985	0.00750836	0.0932352	0.00595647	0.0448352	0.00440749	0.0498692	0.00284615	0.0505485	0.00709783	0.094045	0.0203868	0.0866519	0.0157331	0.0835503	0.00896207
Aspartate	0.0610114	0.00773793	0.118156	0.0126485	0.0659715	0.00291889	0.793479	0.129878	1.56643	0.183111	0.70373	0.13149	0.561137	0.122904	1.4919	0.146856	0.888049	0.0717424
Threonate	0.00206531	0.000462704	0.00264459	0.000133447	0.00210942	0.000158361	0.0158401	0.00297325	0.0238711	0.0038674	0.012565	0.00344865	0.0485478	0.0129873	0.0225597	0.00360341	0.0203312	0.0050984
Asparagine	0.054928	0.0148832	0.064644	0.00602501	0.0463275	0.00351149	0.204499	0.0567005	0.349827	0.15952	0.25551	0.0636598	0.0244874	0.00926749	0.0337614	0.0101243	0.0429109	0.0127345
Xylose	0.0128321	0.00268894	0.0226103	0.00184228	0.015149	0.000966638	0.0181273	0.00218693	0.0284009	0.00348245	0.018908	0.0018693	0.02424	0.00731402	0.0302177	0.00498502	0.0428554	0.00545229
Pyroglutamate	1.14454	0.313654	1.85417	0.323069	1.2327	0.070763	7.95835	0.615953	7.39775	0.421854	8.82041	0.575111	1.36138	0.114768	1.36505	0.0858586	2.12383	0.153316
Glutamate	0.353894	0.0431705	0.456497	0.0338794	0.236139	0.0179454	2.27718	0.162575	1.79777	0.132684	2.45042	0.123207	1.93768	0.149931	1.59678	0.141627	2.08343	0.148102
Rhamnose	0.0104174	0.00128708	0.0118644	0.000406266	0.0123291	0.000316114	0.0384319	0.00371832	0.0429805	0.00171671	0.0526966	0.00340099	0.113384	0.00566055	0.0960609	0.00785466	0.0942402	0.0105061
Putrescine	0.022564	0.00580069	0.0655185	0.00603659	0.029843	0.00768325	0.00813448	0.00191769	0.0506107	0.00415603	0.00357722	0.000562782	0.00195576	0.000276302	0.00261691	0.000296271	0.00189407	0.000344548
2OG	0.00158024	2.64739e-05	0.00212503	0.00019419	0.00154077	9.32549e-05	0.00841043	0.00129079	0.00577389	0.000556262	0.00413641	0.000358434	0.0209862	0.00941217	0.0165949	0.00172878	0.0210612	0.00449183
Phenylalanine	0.223416	0.0893287	0.238373	0.042171	0.104329	0.0113309	0.56422	0.12429	0.707808	0.122715	0.549894	0.0511567	0.046431	0.0126679	0.0348798	0.0109154	0.0475856	0.0324533
2-aminoadipate	0.00383164	0.000596233	0.00379865	0.000416722	0.00308129	0.000192262	0.0273868	0.00316851	0.0249447	0.00370862	0.01215	0.00131647	NA		NA		NA
Ornithine	0.120313	0.03618	0.156901	0.0227473	0.0899158	0.00541652	0.821742	0.185663	0.649645	0.0963813	1.26508	0.128099	0.00676694	0.00277067	0.00529725	0.00130149	0.0131739	0.00511971
Glycerol-3-phosphate	NA		NA		NA		0.00264546	0.000405986	0.00436595	0.000601641	0.00409247	0.000404301	0.00266438	8.25249e-06	0.00154263	0.000137504	0.00391465	0.00101716
Fructose	0.0501797	0.0251377	0.908177	0.075578	0.0858931	0.0131567	0.051787	0.0119898	0.49398	0.139573	0.342061	0.167337	1.06251	0.218651	2.07072	0.210519	2.94749	0.18794
Sorbitol	NA		NA		NA		0.00340453	0.000296025	0.0049363	0.000395757	0.006611	0.000414846	0.0408959	0.00481367	0.040526	0.00331766	0.041589	0.00433883
Glucose	0.0795218	0.0329456	1.36479	0.120842	0.11812	0.0116128	0.107048	0.0165366	0.474359	0.127165	0.301834	0.132927	1.21655	0.16503	1.52222	0.25084	2.26356	0.144556
Citrate	0.0283683	0.0164501	0.0255078	0.00195677	0.0105696	0.00181249	0.447418	0.242084	1.05603	0.129316	0.0380188	0.00810652	1.88284	0.144306	1.81103	0.220956	1.82713	0.0860888
Glutamine	0.292794	0.0938182	0.467877	0.0752477	0.254046	0.0247396	4.19017	0.752416	3.62722	0.462115	5.10675	0.596444	0.0540316	0.00827187	0.0650382	0.00633528	0.0882796	0.0166425
Arginine	0.0471414	0.0145215	0.0672905	0.00879112	0.0329468	0.0029096	0.310146	0.0719449	0.246525	0.040779	0.493917	0.0445085	0.00433109	0.000948138	0.00634795	0.00173816	0.0140509	0.003789
Lysine	0.0819351	0.0187284	0.0586649	0.0163586	0.0585791	0.0035271	0.52527	0.159984	0.259246	0.0709191	0.490356	0.0517771	0.00574582	0.000875583	0.00733203	0.00206789	0.00981572	0.00165716
Dehydroascorbate	0.100464	0.0245628	0.119248	0.0161497	0.110189	0.00862074	0.112713	0.0128512	0.110989	0.0208994	0.051349	0.0107231	0.00845142	0.00167375	0.0130514	0.00105769	0.0117664	0.00214305
Ascorbate	0.0512097	0.0365225	0.0678292	0.013834	0.0346613	0.00615444	0.123885	0.0306907	0.131793	0.034004	0.0366902	0.00587259	NA		0.00288522	0.000530505	0.00289914	0.000517302
myo-inositol	0.0137777	0.00349977	0.0370274	0.00249088	0.0308168	0.00152982	0.0487139	0.00806922	0.0478598	0.00254925	0.115841	0.0195049	0.266842	0.0810283	0.168215	0.0270346	0.319106	0.0552694
Tyrosine	0.059785	0.0179319	0.0466537	0.0112879	0.0361007	0.00396564	0.673928	0.142322	0.565805	0.112663	0.371296	0.0741221	0.0149539	0.00198214	0.0196618	0.00583887	0.028577	0.0112733
Histidine	NA		0.00181312	0.000410835	0.00175552	7.04045e-05	0.0173758	0.00423071	0.0150192	0.0028884	0.0219382	0.00283718	0.00104366	8.5502e-05	0.00249916	0.000353046	0.00395717	0.000350319
Tryptophane	0.0256773	0.0137011	0.0440215	0.0112075	0.0175703	0.00316822	0.147037	0.0442254	0.212869	0.0596195	0.228046	0.0365043	0.0188526	0.00481434	0.0303883	0.00947181	0.0378795	0.0229537
Sucrose	0.0312253	0.00146433	0.179888	0.0158601	0.0233321	0.00149181	0.0890377	0.0107846	0.259491	0.0103588	0.431698	0.161378	2.28179	0.458835	3.69688	0.280951	1.77167	0.242982
Maltose	NA		NA		NA		NA		0.00176961	0.000236938	0.00196385	0.000127659	NA		0.143309	0.023724	0.011972	0.00150223
Trehalose	NA		NA		0.00622336	0.00125195	NA		NA		NA		0.0677224	0.0236733	0.0753512	0.0118296	0.0661375	0.0141509
Melibiose	NA		NA		NA		NA		NA		NA		0.012721	0.00583608	0.0184085	0.00546667	0.0122372	0.00255566
Galactinol	0.00167161	0.000286993	0.0826083	0.00414585	0.00253021	0.000233645	0.00233222	0.00041747	0.00344387	0.000403294	0.00379271	0.00159742	1.57033	0.417764	1.77274	0.180479	1.15306	0.19487
Raffinose	NA		0.0878741	0.00644479	0.00263989	0.00025008	NA		0.00148244	8.33382e-05	0.00445234	0.00255902	1.57034	0.0471041	1.3728	0.037242	1.48726	0.0324603
